# Supplementary material for: The global, regional, and national burden and trends of NAFLD in 204 countries and territories: an analysis from Global Burden of Disease 2019
Source: Research Square preprint supplement (doi:10.21203/rs.3.rs-1242882/v1), 2022-01-10
Supplement: Supplementary file 1 [file 5765565d22bb6d7fbff14ebd.docx]

**Supplementary figure legend:**

**Figure S1.** The change trends of NAFLD ASIR, ASPR, ASDR and age-standardized DALYs from 1990 to 2019. The change trends of ASIR (A), ASPR (B), ASDR (C) and age-standardized DALYs (D) were displayed. Blue bars represent males and red bars represent females. Note: NAFLD, non-alcoholic fatty liver disease; ASIR, age-standardized incident rate; ASPR, age-standardized prevalent rate; ASDR, age-standardized death rate; DALYs, disability-adjusted life years; SDI, social-demographic index.
